# Supplementary material for: Exploring the Role of ChatGPT in Supporting Diagnostic Decision-Making in Dentistry: A Mixed-Methods Comparative Study
Source: Research Square preprint supplement (doi:10.21203/rs.3.rs-6257182/v1), 2025-06-12
Supplement: Supplementary file 1 [file 08c4e96e1e3459b0aa1ce59d.docx]

**Case Scenarios**

The following clinical case scenarios were used in the study’s questionnaire to assess participants’ diagnostic decision-making.

Case 1: Recurrent Caries

A 45-year-old female presents with sensitivity to hot and cold in her lower left molar, which has a large filling and mild gum swelling. Examination reveals visible decay around the filling and mild gum inflammation.

What is the most likely diagnosis?

A) Recurrent caries

B) Periodontal abscess

C) Pulpitis

D) Tooth fracture

Case 2: Periodontitis

A 30-year-old male reports persistent bad breath and bleeding gums for the past two months, with generalized gum inflammation and pocket formation around the teeth.

What is the most likely diagnosis?

A) Gingivitis

B) Periodontitis

C) Oral cancer

D) Dental abscess

Case 3: Squamous Cell Carcinoma

A 60-year-old female presents with a red, painful lesion on the roof of her mouth that has been present for three weeks. The lesion has a white border on the palatal mucosa.

What is the most likely diagnosis?

A) Aphthous ulcer

B) Herpes simplex infection

C) Candidiasis

D) Squamous cell carcinoma

Case 4: Periodontal Disease

A 25-year-old male experiences shifting and loosening of his lower front teeth. He has bone loss around the affected teeth but has not undergone any recent dental treatment.

What is the most likely cause?

A) Orthodontic relapse

B) Periodontal disease

C) Trauma

D) Dental caries

Case 5: Enamel Fracture

A 50-year-old male presents with a chipped tooth sensitive to touch. Clinical examination shows an enamel fracture without pulp exposure and no visible decay.

What is the most appropriate initial treatment?

A) Composite bonding

B) Root canal therapy

C) Dental crown

D) Extraction

Case 6: Dental Fluorosis

A 40-year-old female reports multiple small white spots on her teeth that have been present for several months. There is no discomfort, and examination reveals enamel demineralization.

What is the most likely cause of these white spots?

A) Early enamel caries

B) Fluorosis

C) Calcium deficiency

D) Dental erosion

Case 7: Post-Crown Sensitivity

A 35-year-old male experiences pain on biting and chewing in his upper right first molar. He has a history of recent dental work on that tooth, including a recently placed crown. Pain is present on percussion.

What is the most likely diagnosis?

A) Crown fracture

B) Pulpitis

C) Periapical abscess

D) Post-crown sensitivity

Case 8: Fibroma

A 55-year-old female presents with a firm, sessile, non-tender lump on the buccal mucosa, which has been present for about a month with no change in size.

What is the most likely diagnosis?

A) Mucocele

B) Fibroma

C) Salivary gland tumor

D) Lymphoma

Case 9: Aphthous Stomatitis

A 28-year-old male reports recurrent, painful canker sores inside his lips and cheeks. The ulcers are shallow, grayish, with a red halo, and heal slowly.

What is the most likely diagnosis?

A) Aphthous stomatitis

B) Herpes simplex virus infection

C) Behçet’s disease

D) Systemic lupus erythematosus

Case 10: Glossitis Due to Nutritional Deficiency

A 48-year-old female reports a noticeable change in her tongue’s color, which appears bright red and smooth with loss of papillae. Examination reveals atrophic changes.

What is the most likely diagnosis?

A) Vitamin B12 deficiency

B) Iron deficiency anemia

C) Glossitis

D) Geographic tongue
