# Supplementary material for: Exploring the Role of ChatGPT in Supporting Diagnostic Decision-Making in Dentistry: A Mixed-Methods Comparative Study
Source: Research Square preprint supplement (doi:10.21203/rs.3.rs-6257182/v1), 2025-06-12
Supplement: Supplementary file 2 [file a3b1d276ad2dc1f2993ebed5.docx]

**Interview questions:**

The following semi-structured interview questions were used to explore participants’ perspectives on ChatGPT’s role in diagnostic decision-making in dentistry.

Section 1: General Experience with AI in Dentistry

1. Have you ever used ChatGPT or any other AI tool for dental diagnosis? If yes, how frequently?

2. In what situations do you find AI tools helpful in your clinical practice?

3. Do you believe AI, including ChatGPT, can enhance diagnostic decision-making in dentistry? Why or why not?

Section 2: Accuracy and Reliability of ChatGPT

4. Based on your experience, how would you rate ChatGPT’s accuracy in providing diagnostic suggestions?

5. Have you encountered cases where ChatGPT provided incorrect or misleading diagnoses? Can you describe an example?

6. In your opinion, which dental specialties benefit the most from AI-assisted diagnosis, and which ones are least suited for AI-based decision-making?

Section 3: Clinical Application and Challenges

7. Would you consider integrating ChatGPT into routine clinical practice? What factors would influence your decision?

8. What are the main limitations of ChatGPT in dental diagnosis?

9. Do you think AI tools should be used as a decision-support system for less experienced practitioners (e.g., interns and general practitioners)? Why or why not?

Section 4: Ethical and Professional Considerations

10. What are your thoughts on the ethical concerns related to AI in diagnostics, such as patient privacy, liability, and decision-making authority?

11. In your opinion, what measures should be taken to regulate the use of AI in dental diagnostics?

Section 5: Future Potential and Recommendations

12. How do you see the future role of AI in dentistry evolving over the next 5–10 years?

13. What improvements would you suggest to make AI tools more effective and reliable in dental diagnostics?

14. Would you recommend using ChatGPT for diagnostic support to other dental professionals? Why or why not?
